---

1 **Class II *LBD* genes *ZmLBD5* and *ZmLBD33* regulate gibberellin and**  
2 **abscisic acid biosynthesis**

3 Jing Xiong,<sup>a,2</sup> Xuanjun Feng,<sup>a,b,2,3</sup> Weixiao Zhang,<sup>a</sup> Xianqiu Wang,<sup>a</sup> Yue Hu,<sup>a</sup> Xuemei  
4 Zhang,<sup>a</sup> Fengkai Wu,<sup>a</sup> Wei Guo,<sup>a</sup> Wubing Xie,<sup>a</sup> Qingjun Wang,<sup>a</sup> Jie Xu,<sup>a,b</sup> Yanli Lu,<sup>a,b,4</sup>

5

6 <sup>a</sup>Maize Research Institute of Sichuan Agricultural University, Wenjiang, Sichuan, 611130,  
7 China;

8 <sup>b</sup>State Key Laboratory of Crop Gene Exploration and Utilization in Southwest China,  
9 Wenjiang, Sichuan, 611130, China;

<sup>1</sup>This work was supported by the National Natural Science Foundation of China (Grant: 32030078) and the Foundation of international cooperation in science and technology of Chengdu, China (Grant: 2020-GH02-00027-HZ) (to Y.L.), and the National Natural Science Foundation of China (Grant: 31801371) and the Applied basic research program of Sichuan province, China (Grant: 2020YJ0350) (to X.F.).

10

11 <sup>2</sup>These authors contribute equally to this work.

12 <sup>3</sup>Senior author

13 <sup>4</sup>Author for contact: Yanli Lu ([yanli.lu82@hotmail.com](mailto:yanli.lu82@hotmail.com)).

14 The author responsible for distribution of materials integral to the findings presented in this  
15 article in accordance with the policy described in the Instructions for Authors  
16 ([www.plantphysiol.org](http://www.plantphysiol.org)) is: Yanli Lu ([yanli.lu82@hotmail.com](mailto:yanli.lu82@hotmail.com)).

17

18

19

20

21

22

23

24 **Author Contributions**

25 X.F. and Y.L. designed the research. J.X., W.Z., X.W., Y.H. and X.Z. performed the main  
26 part of experiment. X.F., Q.W, W.G., W.X. and F.W. performed the field investigation of  
27 plant phenotype. J.X. and Y.L. are responsible for managing materials related to the  
28 project. X.F. and J.X. analyzed data and prepared the figures. X.F., J.X. and Y.L. wrote the  
29 manuscript.

30

31

---

32 **Class II *LBD* genes *ZmLBD5* and *ZmLBD33* regulate gibberellin and**  
33 **abscisic acid biosynthesis**

34

35 **ABSTRACT**

36 Lateral organ boundaries domain (LBD) proteins are plant-specific  
37 transcription factors. Class I *LBD* members are widely reported to be pivotal for  
38 organ development, however, the role of class II members is unknown in  
39 cereal crops. Class II LBD proteins are distinguished from class I by the lack of  
40 a Gly-Ala-Ser (GAS) peptide and leucine-zipper-like coiled-coil domain, which  
41 is thought to be essential for protein dimerization. In this study, *ZmLBD5* and  
42 *ZmLBD33* form homo- and hetero-dimers, like class I members. At seedling  
43 stage, *ZmLBD5* promoted biomass accumulation (shoot dry weight and root  
44 dry weight), root development (root length, root number, and root volume), and  
45 organ expansion (leaf area), while *ZmLBD33* repressed these processes and  
46 display a dwarf phenotype. Both *ZmLBD5* and *ZmLBD33* displayed negative  
47 roles in drought tolerance mainly by increasing stomatal density and stomatal  
48 aperture. RNA sequencing, gene ontology enrichment analysis, and transient  
49 luciferase expression assays indicated that *ZmLBD5* and *ZmLBD33* are mainly  
50 involved in the regulation of the *TPS-KS-GA2ox* gene module, which  
51 comprises key enzymatic genes upstream of GA and ABA biosynthesis.  $GA_1$   
52 content increased in *ZmLBD5*-overexpressing seedlings, while  $GA_3$  and  
53 abscisic acid content decreased in both transgenic seedlings. Consequently,  
54 exogenous  $GA_1$  or  $GA_3$  undoubtedly rescued the dwarf phenotype of  
55 *ZmLBD33*-overexpressing plants, with  $GA_1$  performing better. The study of  
56 *ZmLBD5* and *ZmLBD33* sheds light on the function of the class II *LBD* gene  
57 family in maize.

58

59

60 **INTRODUCTION**

61 Gibberellins (GAs) and abscisic acid (ABA) are two phytohormones derived  
62 from isopentenyl diphosphate (IPP). In plastids, IPP is converted to  
63 monoterpenes ( $C_{10}$ ) and geranylgeranyl diphosphate ( $C_{20}$ , GGPP). At GGPP  
64 the pathway in plastids branches out in several directions, with separate  
65 pathways leading to the *ent*-kaurenoids and GAs ( $C_{20}$ ), the phytol side-chain of

66 chlorophyll (C<sub>20</sub>), phytoene and carotenoids (C<sub>40</sub>), and the nonaprenyl (C<sub>45</sub>)  
67 side-chain of plastoquinone (Hedden and Sponsel, 2015; He et al., 2020).  
68 Thus, manipulation of one of the pathways can have significant effects on the  
69 flux through other branches, and any regulation in the pathway upstream of  
70 GGPP will affect all branches. In GA biosynthesis, GGPP is first cyclized to  
71 *ent*-copalyl diphosphate (CPP) by CPP synthases (CPSs) and then converted  
72 to *ent*-kaurene by *ent*-kaurene synthases (KSs) (Hedden and Sponsel, 2015;  
73 He et al., 2020). This is followed by oxidative reactions catalyzed by  
74 cytochrome P450 oxygenases and 2-oxoglutarate-dependent oxygenases that  
75 regulate the dynamic balance between activation and deactivation of GAs  
76 (Hedden and Proebsting, 1999; Fu et al., 2016).

77 GAs and ABA are two of the most studied phytohormones in plants. The  
78 essential role of GAs in shoot elongation has been demonstrated clearly in a  
79 large number of studies (Spray et al., 1996; Teng et al., 2013; Chen et al., 2014;  
80 Nagai et al., 2020). In addition, GAs regulate various aspects of plants, such  
81 as flowering (Bao et al., 2020), root development (Zimmermann et al., 2010),  
82 seed development (White et al., 2000), and stress response (Colebrook et al.,  
83 2014), and the “green revolution” of farming occurred largely owing to the  
84 application of *GA20ox* knockout crops (Hedden, 2003). ABA has multiple  
85 functions, and it is well known to ameliorate abiotic stress. Under the stress of  
86 drought, ABA accumulates rapidly and plays a positive role in drought  
87 tolerance by regulating multiple processes at different tiers, such as the  
88 expression of ABA-responsive genes, stomatal closure, root growth, and the  
89 production of protective metabolites (Mehrotra et al., 2014). ABA is mainly  
90 produced from the cleavage of carotenoids (Sponsel and Hedden, 2010; Xiong  
91 and Zhu, 2003), which are co-derived from GGPP along with GAs (Sponsel  
92 and Hedden, 2010). Thus, the crosstalk between GAs and ABA biosynthesis is  
93 universal.

94 Lateral organ boundaries domain (LBD) proteins are plant-specific  
95 transcription factors (Shuai et al., 2002; Majer and Hochholdinger, 2011; Xu et  
96 al., 2016). Characteristically, they comprise a cysteine C-block (CX<sub>2</sub>CX<sub>6</sub>CX<sub>3</sub>C)  
97 required for DNA-binding activity, a Gly-Ala-Ser (GAS) block, and a leucine  
98 zipper-like coiled-coil motif (LX<sub>6</sub>LX<sub>3</sub>LX<sub>6</sub>L) responsible for protein dimerization  
99 (Shuai et al., 2002; Majer and Hochholdinger, 2011; Xu et al., 2016). Based on

---

100 the conserved domains, LBD genes have been identified and classified into  
101 two groups (class I and class II) (Shuai et al., 2002; Majer and Hochholdinger,  
102 2011; Zhang et al., 2014; Yu et al., 2020). Class I, comprising most of the  
103 members, is characterized by a GAS and leucine-zipper-like coiled-coil domain,  
104 while class II members have no or an incomplete GAS and leucine zipper-like  
105 coiled-coil domain. It is thought that these differences underlie the functional  
106 diversity between class I and class II members (Majer and Hochholdinger,  
107 2011; Xu et al., 2016). Class I members have been mostly reported to play an  
108 important role in auxin response and plant development (Majer and  
109 Hochholdinger, 2011), such as maintaining the indeterminate cell state in the  
110 shoot apical meristem (SAM) (Semiarti et al., 2001; Iwakawa et al., 2007),  
111 female gametophyte development (Evans, 2007), inflorescence architecture  
112 (Bortiri et al., 2006), and formation of seminal and shoot-borne root primordia  
113 (Taramino et al., 2007; Majer et al., 2012; Xu et al., 2015). In contrast, there  
114 are few reports about class II members, and their functions are unclear. The  
115 class II *LBD* genes that have been characterized thus far are not involved in  
116 development but in metabolism, such as anthocyanin biosynthesis and  
117 nitrogen metabolism (Rubin et al., 2009; Albinsky et al., 2010; Majer and  
118 Hochholdinger, 2011). Although the phylogenetic characteristics of the *LBD*  
119 family in maize have been reported (Zhang et al., 2014), there are no reports  
120 about the function of class II *LBDs* in cereal crops.

121 In this study, two class II *LBD* maize genes, *LBD5* and *LBD33*, with high  
122 identity (Zhang et al., 2014), were investigated. Here we found homo- and  
123 hetero-dimerization in both *LBD5* and *LBD33*. This is at odds with the  
124 hypothesis that the GAS and leucine-zipper-like coiled-coil domain is essential  
125 for dimerization in *LBDs*. In addition, *LBD5* and *LBD33* play a role in the  
126 regulation of the core module in GA biosynthesis and affect the final output of  
127 GAs and ABA. This work may contribute to the initial understanding of the  
128 biological function of cereal class II *LBD* genes in cereal crops, and provide a  
129 new insight into the response of drought in maize.

130  
131

---

132 **RESULTS**

133 **LBD5 and LBD33 can form homodimers and heterodimers**

134 Given that the GAS and leucine-zipper-like coiled-coil domain of class I  
135 members is essential for protein dimerization and class II members are  
136 characterized by the lack of or an incomplete domain, the ability of LBD5 and  
137 LBD33 to dimerize was tested. Although LBD5 and LBD33 have no GAS and  
138 leucine-zipper-like coiled-coil domain, homo- and hetero-dimerization were  
139 clearly detected through Y2H and BiFC assays (Fig. 1, A and B). Additionally,  
140 LBD5 and LBD33 displayed weak interactions with the class I member LBD44  
141 (Fig. 1, A and B). To identify the critical domain for dimerization, LBD5 and  
142 LBD33 were cleaved optionally at two sites, and six kinds of peptides were  
143 obtained for Y2H assays (Supplemental Fig. S1A). Parts A, B, and C represent  
144 the N terminal C-block (CX2CX6CX3C), the GAS and leucine-zipper-like  
145 coiled-coil (LX6LX3LX6L) domain, and the C terminal domain, respectively  
146 (Fig. S1A). Unfortunately, we failed to clearly identify which part is responsible  
147 for protein-protein interaction (Supplemental Fig. S1B), but we proposed that  
148 the C part may have a positive effect on dimerization both in LBD5 and LBD33  
149 (Supplemental Fig. S1B).

150 **Effects of LBD5 and LBD33 on organ development and drought tolerance**

151 To investigate the role of *LBD5* and *LBD33* in plant development or  
152 environmental stimuli, first their tissue-specific expression and stimuli  
153 responses were profiled. *LBD5* and *LBD33* were widely expressed in various  
154 tissues and relatively higher in roots (Supplemental Fig. S2A). Therefore, the  
155 response of *LBD5* and *LBD33* to eight phytohormones related to stress  
156 response and organ development was investigated in the roots of seedlings.  
157 *LBD5* and *LBD33* were induced most strongly by GA<sub>3</sub> and JA, and these  
158 stimuli had similar effects (Supplemental Fig. S2B). In addition, responses to  
159 PEG, nitrogen deficiency, and phosphorus deficiency were investigated in the  
160 root and leaf. *LBD5* and *LBD33* were remarkably induced by PEG-mimic  
161 drought stress and nitrogen deficiency in the root. However, responses in the  
162 leaf were weak and differed slightly between *LBD5* and *LBD33* (Supplemental  
163 Fig. S1, C and D).

164 *LBD5* and *LBD33* were overexpressed, which were called LBD5(OE) and  
165 LBD33(OE) hereafter, in a wild-type maize line KN5585. More than seven

166 transgenic lines of each gene were constructed and transcript levels of *LBD5*  
167 and *LBD33* were measured. Three representative transgenic lines of each  
168 gene were used for further study after the detection of expression levels  
169 (Supplemental Fig. S3A). Homozygous lines were hybridized with the wild type,  
170 and the hybrid F1 progenies were used for phenotype investigation. During  
171 germination and the early seedling stage there was no difference between  
172 *LBD5*(OE), *LBD33*(OE), and the wild type (Supplemental Fig. S3B). About 6  
173 days after germination, an obvious dwarf phenotype of *LBD33*(OE) was  
174 observed. About 12 days after germination, *LBD5*(OE) was noticeably taller  
175 than the wild type. Detailed analysis showed that the shoot length, leaf area,  
176 and biomass were remarkably affected by the over expression of *LBD5* and  
177 *LBD33*, and all of these phenotypic values increased in *LBD5*(OE) but  
178 decreased in *LBD33*(OE) (Fig. 3 and Supplemental Fig. S3D). To investigate  
179 the change at the micro-level, leaf cell length and width was observed. As  
180 expected, cells were longer in *LBD5*(OE) and shorter in *LBD33*(OE) than that  
181 in the wild type (Supplemental Fig. S4). Unexpectedly, *LBD33*(OE) plants  
182 possessed narrower leaves but wider cells and *LBD5*(OE) possessed wider  
183 leaves but narrower cells than the wild type (Supplemental Fig. S4). We thus  
184 speculated that the leaf cell number may be lower in *LBD33*(OE) and higher in  
185 *LBD5*(OE). To investigate the effects on below-ground parts, seedlings were  
186 grown in hydroponic conditions. The root number, primary root length, root  
187 surface area, root volume, shoot fresh weight, and root fresh weight were all  
188 greater in *LBD5*(OE) and lesser in *LBD33*(OE) than that in the wild type  
189 (Supplemental Fig. S3, C and D). However, the difference in root dry weight  
190 between *LBD5*(OE), *LBD33*(OE), and the wild type was not significant when  
191 grown in soil (Fig. 2B).

192 Given the strong response of *LBD5* and *LBD33* to PEG-mimic drought  
193 stress, wild type and different transgenic lines were grown in separate pots  
194 and exposed to water deficiency. Both *LBD5*(OE) and *LBD33*(OE) displayed  
195 earlier withering than the wild type, and this effect was more remarkable in  
196 *LBD5*(OE) than in *LBD33*(OE) (Fig. 2A). The biomass penalty under water  
197 deficient conditions also indicated that *LBD5*(OE) and *LBD33*(OE) were more  
198 sensitive to drought stress than the wild type when grown in separate pots (Fig.  
199 2, B-D).

200 However, after anthesis in the field, the ear height and the internode length  
201 of lines 5-2 and 5-4 were shorter than that of the wild type (Supplemental Fig.  
202 S5C and Table S1). However, the effect of LBD5 on plant height was not clear,  
203 because line 5-1 was taller, line 5-2 was shorter, and line 5-4 was similar when  
204 compared with the wild type (Supplemental Fig. S5, A and B). The increase in  
205 plant height of line 5-1 may be attribute to the larger number of internodes  
206 (Supplemental Fig. S5D). Thus, we speculate that LBD5 may have a positive  
207 effect on internode number and a negative effect on internode length.  
208 LBD33(OE) plants were significantly shorter than the wild type owing to the  
209 decrease in internode length but not internode number (Supplemental Fig. S5,  
210 A-D and Table S1). Grain yields upon well-watering and drought stress  
211 conditions supported the drought sensitive phenotype of LBD5(OE) and  
212 LBD33(OE) (Fig. 2, G-I). In addition, *LBD5* and *LBD33* negatively regulate  
213 grain yield with different mechanism. *LBD33* decreased ear size and  
214 hundred-grain weight simultaneously, while *LBD5* mainly decreased ear size  
215 (Fig. 2, G-I and Supplemental Fig. S5, E and F).

#### 216 **LBD5 and LBD33 promote water loss by increasing stomatal density and** 217 **stomatal aperture**

218 To unravel the underlying mechanism by which LBD5(OE) and LBD33(OE)  
219 increased sensitivity to drought stress, the rates of water loss (RWL) of  
220 detached leaves were measured. LBD5(OE) and LBD33(OE) had significantly  
221 higher RWL than the wild type (Fig. 3A). The stronger water loss in LBD5(OE)  
222 and LBD33(OE) may have, consequently, resulted in earlier soil drought after  
223 the outage of water. Thus, the soil moisture content (SMC) was analyzed.  
224 Fifteen days after the outage of water SMC was lowest in LBD5(OE) and  
225 remarkably lower in LBD33 (OE) than in the wild type (Fig. 3B). Further, the  
226 stomatal density and open-closed-ratio (OCR) were investigated. To measure  
227 OCR, leaves were detached from 12-day-old seedlings and dehydrated for 12  
228 minutes in original growing conditions. Interestingly, LBD5(OE) and LBD33(OE)  
229 had higher stomatal density and OCR than the wild type (Fig. 3, C and D and  
230 Supplemental Fig. S6A).

231 In addition, stomatal aperture after ABA or H<sub>2</sub>O<sub>2</sub> stimulation was investigated.  
232 Detached leaves were pretreated with stomatal opening buffer to get the  
233 maximum degree of stomatal openness. Then, ABA or H<sub>2</sub>O<sub>2</sub> was added, and

234 stomatal aperture was fixed at different times. The stomatal aperture of  
235 LBD5(OE) and LBD33(OE) was greater than that of wild type, upon both ABA  
236 and H<sub>2</sub>O<sub>2</sub> treatment (Supplemental Fig. S6, B and C). ABA and H<sub>2</sub>O<sub>2</sub> are both  
237 powerful stimulators of stomatal closure. These results indicated that  
238 overexpression of *LBD5* or *LBD33* could reduce the sensitivity of stomata to  
239 ABA and H<sub>2</sub>O<sub>2</sub>.

240 To determine if there were other factors that made LBD5(OE) and  
241 LBD33(OE) more sensitive to drought stress, transgenic and wild-type plants  
242 were grown in the same pots to test the difference in drought tolerance.  
243 LBD5(OE), LBD33(OE), and the wild type withered at almost the same time  
244 after the outage of water. However, the penalty of shoot dry weight upon  
245 drought stress was greater in LBD5(OE) and LBD33(OE) (Fig. 3E). These  
246 results suggest that enhanced water loss from stomata was one cause of  
247 drought sensitivity in LBD5(OE) and LBD33(OE) plants.

#### 248 **LBD5 and LBD33 may function in the GGPP–CPP–kaurene/acid–GA** 249 **metabolic pathway**

250 As transcription factors, overexpression of LBD5 or LBD33 may widely affect  
251 the expression of downstream target genes, leading to the final phenotype.  
252 Therefore, RNA-seq was performed using 12-day-old seedlings to profile the  
253 change of gene expression in LBD5(OE) and LBD33(OE) compared with the  
254 wild type. A total of 1844 and 1174 differentially expressed genes (DEGs )  
255 were identified in LBD5 (OE) and LBD33(OE), respectively (Fig. 4A and  
256 Supplemental Table S2). There were 666 members in the intersection of DEGs  
257 between LBD5(OE) and LBD33(OE), and almost all of these genes displayed  
258 a similar expression change in LBD5(OE) and LBD33(OE) when compared to  
259 the wild type (Fig. 4A). Of the 666 shared DEGs, 417 were down regulated (Fig.  
260 4A). When DEGs from LBD5(OE) and LBD33(OE) were combined, the 3018  
261 total genes could be clustered into 6 groups based on the change in  
262 expression level (Fig. 4B). Almost all of the shared 666 genes were found in  
263 group 2 or group 5, in which genes displayed a similar expression change in  
264 LBD5(OE) and LBD33(OE) compared to the wild type. It is plausible that the  
265 similar phenotype of LBD5(OE) and LBD33(OE) is caused by the 666 shared  
266 DEGs or the other members of group 2 and group 5.



267 Further, DEGs of LBD5(OE) and LBD33(OE) were used for Gene Ontology  
268 (GO) enrichment analysis. Results provided a similar and reliable biologic  
269 process for LBD5(OE) and LBD33(OE), namely terpenoid biosynthesis (Fig.  
270 4C and Supplemental Table S3). A total of 15 DEGs annotated in terpenoid  
271 biosynthesis were mainly involved in the GGPP–CPP–kaurene/acid–GA  
272 pathway (Fig. 5A). Five of the six genes involved in GGPP biosynthesis were  
273 down-regulated in LBD5(OE) and LBD33(OE) (Fig. 5A). We speculated that  
274 those 15 genes may be downstream targets of LBD5 and LBD33.

### 275 **LBD5 and LBD33 directly regulate the *TPS-KS-GA2ox* gene module**

276 To investigate whether LBD5 and LBD33 directly regulate the transcription of  
277 candidate target genes, promoters of the candidate genes were cloned for  
278 yeast one-hybrid assays. Firstly, the full length of LBD5 and LBD33 were used  
279 for the Y1H assays along with 5 candidate promoters. However, none of the  
280 five promoter-driven *LacZ* reporter genes could be activated by LBD5 or  
281 LBD33 (Supplemental Fig. S7A). Given that most genes were down-regulated  
282 by LBD5 and LBD33, we speculated that full length LBD5 and LBD33 may  
283 have transcriptional inhibitory activity and block the activation of reporter gene.  
284 Therefore, LBD5 and LBD33 were cleaved optionally at two sites and six kinds  
285 of peptides were obtained, as shown in Figure S1A, to test the transcriptional  
286 inhibitory activity. Full length LBD5, LBD5-BC, LBD33-B, and LBD33-BC  
287 displayed remarkable transcriptional inhibitory activity (Supplemental Fig. S7B).  
288 LBD5-AB and LBD33-AB, which contained the C-block for DNA binding, had  
289 no transcriptional inhibitory activity. Therefore, LBD5-AB and LBD33-AB were  
290 then used for Y1H assays along with 15 promoters. LBD5-AB and LBD33-AB  
291 could bind to 9 and 5 promoters, respectively (Fig. 5B).

292 Given that LBD proteins are plant specific transcription factors, the  
293 regulation of 15 candidate target genes by LBD5 and LBD33 was investigated  
294 in plant cells. The promoters of candidate genes were cloned to drive the  
295 expression of the *LUC* reporter gene. CaMV35S-controlled *LBD5* or *LBD33*  
296 was fused with *GFP* and transiently co-expressed with each  
297 candidate-promoter-driven *LUC* in tobacco. Compared with the fold-change of  
298 transcription level, luciferase enzymatic activity assays showed that 13 and 11  
299 candidate promoters displayed similar behavior upon the overexpression of  
300 *LBD5* and *LBD33*, respectively (Fig. 5, A and B). Taking Y1H and

301 dual-luciferase expression assays into consideration, we identified that LBD5  
302 and LBD33 directly regulated 7 and 5 of the 15 candidate target genes,  
303 respectively.

### 304 **LBD5 and LBD33 affect seedling size by modulating GA biosynthesis**

305 In plants, ABA is mainly produced from the cleavage of carotenoids (Sponsel  
306 and Hedden, 2010; Xiong, 2003), which are co-derived from GGPP along with  
307 GAs. Aforementioned results indicated that LBD5 and LBD33 negatively  
308 regulate drought tolerance by inhibiting stomatal closure, a process in which  
309 ABA is important. Therefore, concentrations of ABA and GAs (the main  
310 bioactive form GA<sub>1</sub>, GA<sub>3</sub>, GA<sub>4</sub>, and GA<sub>7</sub>) (Hedden and Phillips, 2000), two  
311 kinds of phytohormone downstream of GGPP, were measured using  
312 12-day-old seedlings. ABA and GA<sub>3</sub> contents were lower in both LBD5(OE)  
313 and LBD33(OE) than in the wild type (Fig. 6A). Interestingly, GA<sub>1</sub> content was  
314 higher in LBD5(OE) than in the wild type (Fig. 6A). This may explain why  
315 LBD5(OE) seedlings were taller than the wild type. However, it is difficult to  
316 determine the causal gene from the 15 candidate genes based on the subtly  
317 different responses to LBD5 and LBD33 overexpression. Most redox reactions  
318 in GA metabolism are catalyzed by cytochrome P450s (He et al., 2020;  
319 Hedden and Sponsel, 2015; Sponsel and Hedden, 2010), and 44 cytochrome  
320 P450 members were identified in the top enriched GO term (Supplemental  
321 Table S3). Thus, the expression change of these 44 members may also  
322 contribute to the change in GAs and ABA in LBD5(OE) and LBD33(OE).

323 GAs widely affect plant development, particularly stem elongation (Spray et  
324 al., 1996; Teng et al., 2013; Chen et al., 2014; Nagai et al., 2020). To test the  
325 causality of GA<sub>1</sub> and GA<sub>3</sub> content on the dwarf phenotype of LBD33(OE)  
326 seedlings, exogenous GA<sub>1</sub> and GA<sub>3</sub> were applied in hydroponic conditions.  
327 The application of GA<sub>1</sub> and GA<sub>3</sub> remarkably promoted the growth of  
328 LBD33(OE) seedlings and reduced the difference between LBD33(OE) and  
329 the wild type (Fig. 6A). GA<sub>1</sub> displayed a well phenotypic compensatory effect at  
330 0.05 µg/mL (Fig. 6, B and C). However, the effect of GA<sub>3</sub> was weak at 0.05  
331 µg/mL, and a higher concentration was needed to better rescue the dwarf  
332 phenotype of LBD33(OE) seedlings (Fig. 6, B and C). Therefore, GA<sub>1</sub> may  
333 exhibit the dominant effect on shoot growth and elongation at the seedling  
334 stage in maize.



---

336 **DISCUSSION**

337 Class I members of the LBD gene family are involved in the regulation of  
338 almost all aspects of plant development, including embryo, root, leaf, and  
339 inflorescence development (Majer and Hochholdinger, 2011). However, there  
340 are few reports to date on the function of class II members. Characterized  
341 class II members, *AtLBD37*, *AtLBD38*, and *AtLBD39*, are not involved in  
342 development but in anthocyanin biosynthesis and nitrogen metabolism  
343 (Scheible et al., 2004; Rubin et al., 2009; Albinsky et al., 2010; Majer and  
344 Hochholdinger, 2011). Here, we investigated the function of two members of  
345 the class II *LBD* genes in maize. Multiple lines of evidence suggested that  
346 *ZmLBD5* and *ZmLBD33* are involved in the regulation of terpenoid metabolism,  
347 and consequently determine GA and ABA content, thus affecting plant  
348 development and drought response.

349 Class I members of the LBD protein family are distinguished from class II  
350 members by the existence of the GAS and leucine-zipper-like coiled-coil  
351 domain (Majer and Hochholdinger, 2011; Xu et al., 2016). This domain is  
352 thought to be required for protein dimerization (Majer and Hochholdinger, 2011;  
353 Xu et al., 2016). In this study, LBD5 and LBD33, which are class II members  
354 lacking a typical GAS and leucine-zipper-like coiled-coil domain, formed  
355 homodimers and heterodimers like class I members, implying the typical GAS  
356 and leucine-zipper-like coiled-coil domain is not essential for dimerization.  
357 However, no domain responsible for dimerization has been identified in LBD5  
358 and LBD33. Heterodimerization between LBD5 and LBD33 was strong.  
359 However, the interaction was weak when LBD44, a class I member, was used  
360 to form heterodimers with LBD5 or LBD33. These results imply that similarity  
361 between sequences may facilitate dimerization between LBD monomers.

362 DEGs in *LBD5*- and *LBD33*-overexpressing plants compared to the wild type  
363 are perfectly enriched in the same biological process upstream of GA  
364 biosynthesis, which was reminiscent of the similar and drastic responses of  
365 *LBD5* and *LBD33* to GA<sub>3</sub> treatment. GA<sub>3</sub> content decreased in both LBD5(OE)  
366 and LBD33(OE), which is consistent with the down-regulation of most DEGs in  
367 the GGPP–CPP–kaurene/acid–GA metabolic pathway. In line with the  
368 down-regulation of most DEGs, LBD5 and LBD33 have transcriptional  
369 inhibitory activity. Application of exogenous GA<sub>1</sub> and GA<sub>3</sub> clearly restored the

370 dwarf phenotype of LBD33(OE), particularly for shoot length and shoot fresh  
371 weight, indicating that decreased GA<sub>1</sub> and GA<sub>3</sub> content are the immediate  
372 cause of the dwarf phenotype. Although the expression change of most  
373 enriched genes was similar, GA<sub>1</sub> increased in LBD5(OE) and remained  
374 unchanged in LBD33(OE), which may explain the taller phenotype of  
375 LBD5(OE). GA<sub>1</sub> has been identified in 86 plants, more than any other GA, and  
376 studies utilizing single gene dwarf mutants have shown that it is the major  
377 bioactive form involved in stem elongation in *Zea mays* and *Pisum sativum*  
378 (Sponsel and Hedden, 2010; Spray et al., 1996). Our results also attest that  
379 GA<sub>1</sub> has a higher bioactivity, because low concentrations of GA<sub>1</sub> rescued the  
380 dwarf phenotype of LBD33(OE) as well as high concentrations of GA<sub>3</sub>.

381 ABA is the most important signal in drought response. Under water deficient  
382 conditions, ABA accumulates rapidly and leads to stomatal closure to limit  
383 transpirational water loss (Mehrotra et al., 2014). In *LBD5*- and *LBD33*-  
384 overexpressing plants, the ABA content was decreased probably due to the  
385 down-regulation of genes involved in the biosynthesis of the upstream GGPP.  
386 As a result, LBD5(OE) and LBD33(OE) had larger stomatal apertures and  
387 enhanced transpirational water loss compared with the wild type. However, the  
388 mechanism by which *LBD5* and *LBD33* reduce the sensitivity of stomata to  
389 exogenous ABA and H<sub>2</sub>O<sub>2</sub> is not clear.

390 In addition, *LBD5* and *LBD33* increased stomatal density. Although there are  
391 few reports on the involvement of *LBD* genes in the regulation of stomatal  
392 density, *GID1*, a very important receptor of GA, plays a negative role in  
393 stomatal density in rice (Du et al., 2015). The *gid1* mutant displays extreme  
394 dwarfism, increased stomatal density and decreased stomatal sensitivity to  
395 water deficiency (Du et al., 2015). Here, the phenotypes of LBD5(OE) and  
396 LBD33(OE) were similar to that of *gid1*. Further studies are needed to  
397 determine if the decrease of GA<sub>3</sub> in LBD5(OE) and LBD33(OE) plants mimics  
398 *gid1* or if there exists underlying causality.

399 In conclusion, *ZmLBD5* and *ZmLBD33* are mainly involved in the regulation  
400 of the *TPS-KS-GA2ox* gene module, which comprises key enzymatic genes  
401 upstream of GA and ABA biosynthesis. Subtle differences in the regulation of  
402 these genes led to GA<sub>1</sub> accumulation and a taller phenotype in LBD5(OE)  
403 seedlings. Overexpression of *LBD5* and *LBD33* inhibited GA<sub>3</sub> and ABA

---

404 biosynthesis and resulted in a dwarf phenotype in LBD33(OE) and drought  
405 sensitive phenotype in both LBD5(OE) and LBD33(OE). The study of *ZmLBD5*  
406 and *ZmLBD33* sheds light on the function of the class II *LBD* gene family in  
407 maize.

## 408 MATERIALS AND METHODS

### 409 Plant growth and phenotyping

410 To analyze the expression patterns of LBD5 and LBD33 in different maize  
411 tissues, the primary roots and coleoptiles were collected from seedlings  
412 germinated for 3 days (VE stage); seminal roots and leaves were collected at  
413 the three-leaf stage (V1 stage); and aerial root, stem, ear leaf, husk, silk,  
414 immature ears, and tassels were collected from the V13 stage in a maize  
415 inbred line (B73) for RNA isolation.

416 For stress and phytohormone treatment, two-leaf-stage seedlings were  
417 transferred to Hoagland nutrient solution in a greenhouse with a 14-h light/10-h  
418 dark photoperiod at 28°C and grown to the three-leaf-stage. Then, seedlings  
419 were subjected to polyethylene glycol 6000 (PEG6000) (20% w/v), nitrogen  
420 deficiency (0.1 mM nitrogen), phosphorus deficiency (without phosphorus),  
421 ABA (10 µM), GA<sub>3</sub> (1 µM), ethephon (50 µM), indoleacetic acid (IAA) (5 nM),  
422 jasmonic acid (JA) (20 µM), salicylic acid (SA) (2 mM), 6-benzyl aminopurine  
423 (6-BA) (4 µM), or brassinolide (100 nM). For PEG, nitrogen deficiency, and  
424 phosphorus deficiency, root and leaf tissues were harvested after 0, 1, 3, 6, 12,  
425 24, and 48 hours of treatment. For phytohormone treatment, the roots were  
426 collected after 0, 1, 3, 6, 12, and 24 hours of treatment. The harvested  
427 samples were frozen immediately in liquid nitrogen and used for RNA isolation.

428 To analyze the root traits, seedlings were grown in rolled-up germination test  
429 paper in nutrient solution. After 15 days, root volume and root surface area  
430 were analyzed with WinRhizo Pro 2008a, an image analysis system (Regent  
431 Instr. Inc., Quebec, 13 Canada) with a professional scanner (Epson XL 1000;  
432 Japan). Root number, primary root length, root fresh weight, shoot fresh weight  
433 and shoot length (the length of the aerial part when the seedling was fully  
434 stretched) were measured manually. To analyze the effect of GA<sub>1</sub> and GA<sub>3</sub> on

---

435 *ZmLBD33*-overexpressing plants, wild type (KN5585) and overexpression line  
436 33-4 were germinated and grown in rolled-up germination test paper in nutrient  
437 solution containing GA<sub>1</sub> or GA<sub>3</sub> (0, 0.05, 0.1, 0.5, or 1.0 ng/mL). After 15 days,  
438 the shoot length, second leaf area (length × width × 0.75), root fresh weight,  
439 and shoot fresh weight were measured manually. Root traits were analyzed  
440 with WinRhizo Pro. For each treatment, at least 15 seedlings were used, and  
441 each treatment was repeated thrice.

442 For drought stress tests in individual pots, equal volumes of well-mixed soil,  
443 containing 200 mL of water, was put in each pot (length × width × height = 10 ×  
444 10 × 13 cm), and 5 seedlings of each line were grown in different pots. The  
445 control group was well watered, whereas the test group was not watered until it  
446 exhibited wilting. The shoot dry weight and root dry weight were measured. To  
447 analyze the soil moisture, 1 cm<sup>3</sup> soil was sampled from each pot at three  
448 different stages (0, 10, and 15 days after planting).

449 For same-pot drought stress tests, larger pots (length × width × height = 54 ×  
450 28 × 4 cm) were used. Various transgenic plant lines and wild type plants were  
451 grown in the same pot. When test seedlings displayed significant wilting,  
452 photographs were taken and shoot dry weight was measured.

### 453 **Overexpression of *LBD5* and *LBD33***

454 The coding sequence of *ZmLBD5* or *ZmLBD33* was cloned into  
455 pCAMBIA3301 between BamH I and Sac I restriction sites and fused with HA  
456 and FLAG tags at N- and C- terminals, respectively, and expression was driven  
457 by the maize ubiquitin promoter. The vector was introduced into agrobacterium  
458 EHA105. Agrobacterium-mediated maize transformation was performed at  
459 Weimi Biotechnology (Jiangsu) Co. LTD, and the maize inbred line KN5585  
460 was used as a recipient. Basta herbicide (0.3%, [v/v]) and PCR were used to  
461 identify transgenic plants.

### 462 **Yeast two-hybrid (Y2H) and bimolecular fluorescence complementation** 463 **(BiFC)**

464 To test whether *ZmLBD5* and *ZmLBD33* forms dimer with other LBDs or

465 itself, the full codon regions of *ZmLBD5*, *ZmLBD33*, and *ZmLBD44* were  
466 individually cloned into pGBK-T7 and/or pGAD-T7 vector and fused with BD  
467 and/or AD. BD-fused *ZmLBD5*, *ZmLBD33*, or *ZmLBD44* was individually  
468 co-transformed with AD-fused *ZmLBD5*, *ZmLBD33*, and empty pGAD-T7 into  
469 the Y2HGold yeast strain. Yeast cells harboring pGBK-T7 and pGAD-T7  
470 vectors were diluted to three concentrations and grown on nonselective  
471 (SD/-Trp/-Leu) or selective (SD/-Trp/-Leu/-His/-Ade) medium. A pGBKT7-53  
472 and pGADT7-T combination was used as a positive control (+). A  
473 pGBKT7-Lam and pGADT7-T combination was used as a negative control (-).  
474 To test the effect of different regions, *ZmLBD5* and *ZmLBD33* were segmented  
475 into three parts (A: N-terminal C-block domain, B: GAS and leucine-zipper-like  
476 coiled-coil domain, and C: C-terminal domain) based on the genome wide  
477 analysis of LBD genes in maize (Zhang et al., 2014). For BiFC assays, the full  
478 codon regions of *ZmLBD5*, *ZmLBD33*, and *ZmLBD44* were individually cloned  
479 into pXYc104 and pXYn106 vectors and fused with the C-terminal (YC) and  
480 N-terminal (YN) of YFP. Then, indicated plastid combinations were  
481 co-transformed into agrobacterium cells. Transient expression was performed  
482 on *N. benthamiana* leaves. Primers and constructions are listed in  
483 Supplemental Table S4.

#### 484 **Yeast one-hybrid (Y1H)**

485 To investigate the binding of *ZmLBD5* and *ZmLBD33* to the promoters of  
486 candidate genes, *ZmLBD5*, *ZmLBD5AB*, *ZmLBD33*, and *ZmLBD33AB* were  
487 inserted into the pJG4-5 vector and fused with a TF-activating domain. The  
488 promoters (about 2,000-bp) of 15 candidate genes were inserted into pLacZi2u  
489 upstream of the lacZ reporter. Then, these vectors were co-transformed into  
490 the yeast strain EGY48, screened upon SD Base (without Trp and Ura, with  
491 glucose as the carbon source), and validated by PCR. The positive clones  
492 were then transferred to another SD Base [without Trp and Ura, replacing  
493 glucose with galactose and raffinose, and containing X-gal  
494 (5-bromo-4-chloro-3-indolyl- $\beta$ -D-galactopyranoside)] for blue color  
495 development (Feng et al., 2016).

496 To investigate whether *ZmLBD5* and *ZmLBD33* have transcriptional



---

497 inhibition activity, A, B, C, AB, BC, and full codon regions of *ZmLBD5* and  
498 *ZmLBD33* were amplified and fused with the *Gal4-AD* sequence. Then, the  
499 fused fragments were cloned into pGBKT7 and fused with the *Gal4-BD*  
500 sequence. *Gal4-AD* was cloned into pGBKT7 and fused with the *Gal4-BD*  
501 sequence, and complete *Gal4* was attained and used as a control. The  
502 transformation was conducted according to the manual of Yeast Protocols  
503 Handbook (Clontech). Primers and constructions are listed in Supplementary  
504 Table S4.

### 505 **Transient dual-luciferase expression assays**

506 Reporters were constructed based on the pGreenII 0800-LUC vector and  
507 the effectors were constructed based on the pCAMBIA2300-eGFP vector.  
508 About 2,000-bp promoter fragments of candidate genes were amplified from  
509 B73 genomic DNA by PCR and cloned into pGreenII-LUC to drive the LUC  
510 reporter. *ZmLBD5* and *ZmLBD33* were cloned into pCAMBIA2300-eGFP and  
511 driven by the CaMV35S promoter. The empty vector pCAMBIA2300-eGFP  
512 was used as a control. Primers and constructions are listed in Supplementary  
513 Table S4.

514 Transient dual-luciferase assays were performed in tobacco leaves. A  
515 dual-luciferase assay kit (Vazyme, DL101-01) was used for enzymatic activity  
516 measurement. Three independent measurements were carried out for each  
517 analysis, and four biological repeats were performed.

### 518 **Measurement of stomatal density and stomatal aperture**

519 At the three-leaf stage, the middle parts of the last fully expanded leaves  
520 were used for stomata measurement. The number of stomata in each  
521 microscopic field on abaxial leaf and adaxial leaf were calculated using an  
522 Olympus microscope (IX73, Japan) with a 10× objective lens. For each line,  
523 ten plants were selected for the counting and three replicates were performed.  
524 To investigate the ratio of open and closed stomata after dehydration, abaxial  
525 leaves were covered with clear nail polish 12 minutes after detachment. The  
526 shape of the stomata is stamped into the nail polish film during the rapid curing.  
527 The nail polish film was then stripped off and placed on a glass slide for

528 microscopic observation with a 100× objective lens. For the assessment of  
529 stomatal closure dynamics induced by ABA and H<sub>2</sub>O<sub>2</sub>, the detached leaves  
530 were floated on stomatal opening buffer (10 mM Tris-HCl, pH 5.6, 10 mM KCl,  
531 and 50 μM CaCl<sub>2</sub>) for 3 h under light to induce the stomata to open to the  
532 maximum extent. Then, 10 μM ABA or 1 mM H<sub>2</sub>O<sub>2</sub> was added to induce  
533 stomata closure and stomatal aperture was fixed at different time points using  
534 nail polish. Stomatal images were analyzed with ImageJ software to measure  
535 the aperture size. More than 30 stomata per sample were measured and each  
536 treatment included three replicates.

### 537 **RNA sequencing**

538 RNA sequencing (RNA-seq) was performed on the transgenic lines 5-1,  
539 33-5, and the wild type plants. Twelve-day-old seedlings were harvested for  
540 total RNA extraction. Sequencing and analysis were entrusted to Beijing  
541 Novogene company (<https://www.novogene.com/>) using the Illumina HiSeq  
542 4000 sequencing platform.

### 543 **GA and ABA content**

544 Endogenous GAs (GA<sub>1</sub>, GA<sub>3</sub>, GA<sub>4</sub>, and GA<sub>7</sub>) and ABA contents were  
545 measured in the overexpression lines 5-1 and 33-4, and in wild-type plants.  
546 Approximately 5 g of aerial tissue was harvested from 12-day-old seedlings  
547 grown under normal conditions (14-h light/10-h dark photoperiod at 28°C).  
548 Measurement of the GA and ABA content was entrusted to Convinced-Test  
549 (Nanjing) and analyzed by liquid chromatography-mass spectrometry (LC-MS).  
550 Two biological repeats were prepared, and three technical repetitions were  
551 performed for each sample.

### 552 **Real-time quantitative PCR**

553 Total RNA was isolated with a Plant Total RNA Isolation kit (FOREGENE,  
554 RE-05014). Genomic DNA in samples was removed with RNase-free DNase I  
555 (Trans, GD201-01). RNA concentration was measured by spectrophotometer  
556 (NanoDrop 2000C). First-strand cDNA was synthesized using Prime Script RT  
557 reagent kit with gDNA Eraser (Takara, RR047A) from DNase I-treated RNA.

558 Real-time quantitative PCR was performed using SYBR Green Fast qPCR Mix  
559 (ABclonal, RM21203) and a BioRad CFX96 machine. *ZmeF1a* was used as  
560 reference gene to normalize the expression of candidate genes. Primers are  
561 listed in Supplemental Table S5.

## 562 **Statistical Analysis**

563 Unless noted otherwise, data are presented as the mean  $\pm$  sd. Statistical  
564 significance was determined through one-way ANOVA analysis using  
565 GraphPad Prism (version 9.0). Variations were considered significant if  $P$   
566  $< 0.05$ (\*),  $0.01$ (\*\*) or  $0.001$ (\*\*\*).

## 567 **ACCESSION NUMBERS**

568 Sequence data for genes and proteins presented in this article can be found  
569 in the *EnsemblPlants* database under the following accession numbers:  
570 *ZmLBD5* (Zm00001d029506), *ZmLBD33* (Zm00001d038717), *ZmLBD44*  
571 (Zm00001d023316), *ZmEF1a* (Zm00001d046449). The RNA-seq data was  
572 deposited in NCBI with BioProject ID: PRJNA715318.

573

## 574 **ACKNOWLEDGMENTS**

575 We thank Dr. Peter Hedden from Rothamsted Research, UK for his inspiring  
576 work and the valuable suggestions on our research.

577

## 578 **Figure Legends**

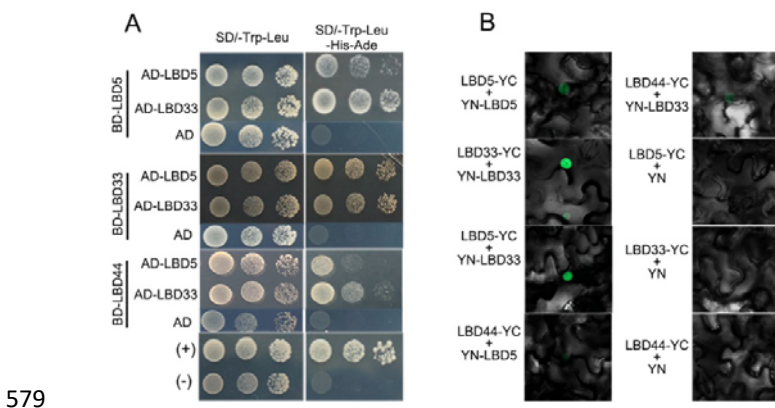

580 **Figure 1. Protein-protein interaction analyzed by yeast two-hybrid and bimolecular**  
581 **fluorescence complementation.** Full codon region of *ZmLBD5*, *ZmLBD33*, and  
582 *ZmLBD44* were used here. (A) The yeast cells harboring the indicated plasmid  
583 combinations were grown on nonselective (SD/-Trp/-Leu) or selective  
584 (SD/-Trp/-Leu/-His/-Ade) medium. Cells were diluted in three concentrations from left to

585 right. (B) *ZmLBD5*, *ZmLBD33* and *ZmLBD44* was individually cloned into pXYc104 and  
 586 pXYn106 vectors, and fused with C-terminal (YC) or N-terminal (YN) of YFP. The  
 587 indicated plastid combinations were transiently co-expressed in tobacco.  
 588

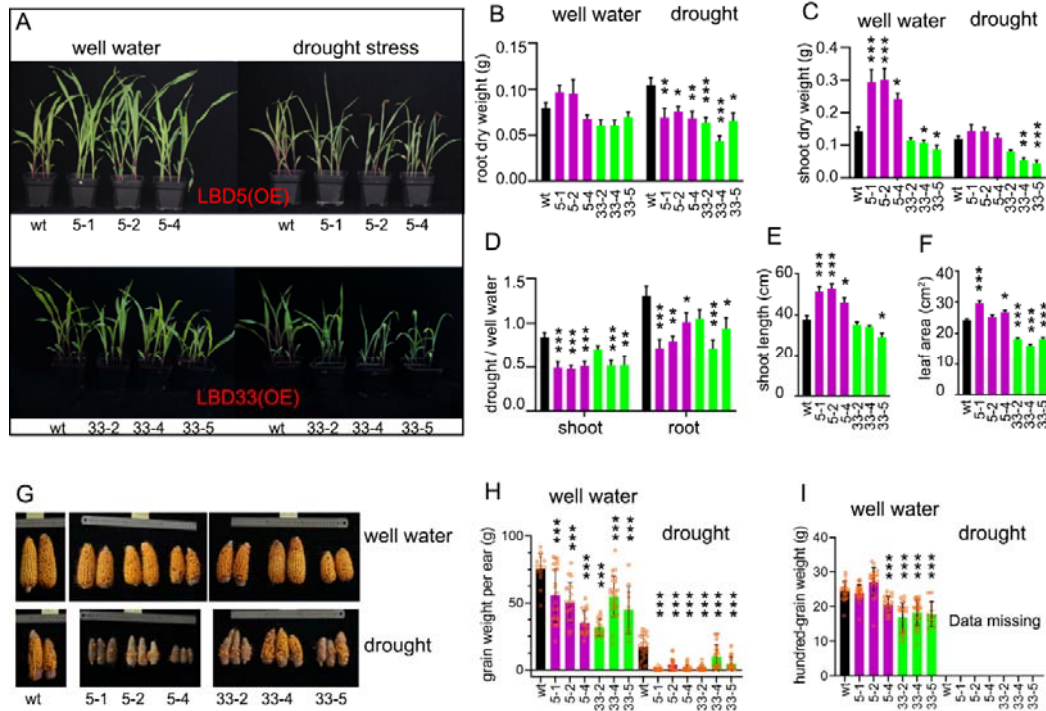

589  
 590 **Figure 2. *ZmLBD5* or *ZmLBD33* over-expressed plants are drought sensitive.** (A)  
 591 Wild type and individual transgenic lines were grown in separate pot exposed to well  
 592 water or drought stress conditions. Quantitative description the phenotypes of root dry  
 593 weight (B), shoot dry weight (C), ratio of dry weight between drought stress and well water  
 594 conditions (D), shoot length (E) and leaf area (F). Ear phenotype (G), grain weight per ear  
 595 (H), and hundred-grain weight (I) of transgenic plants and wild type in field upon well water  
 596 and drought conditions. Asterisks on bar represent the difference compared with wild type  
 597 is significant.  
 598

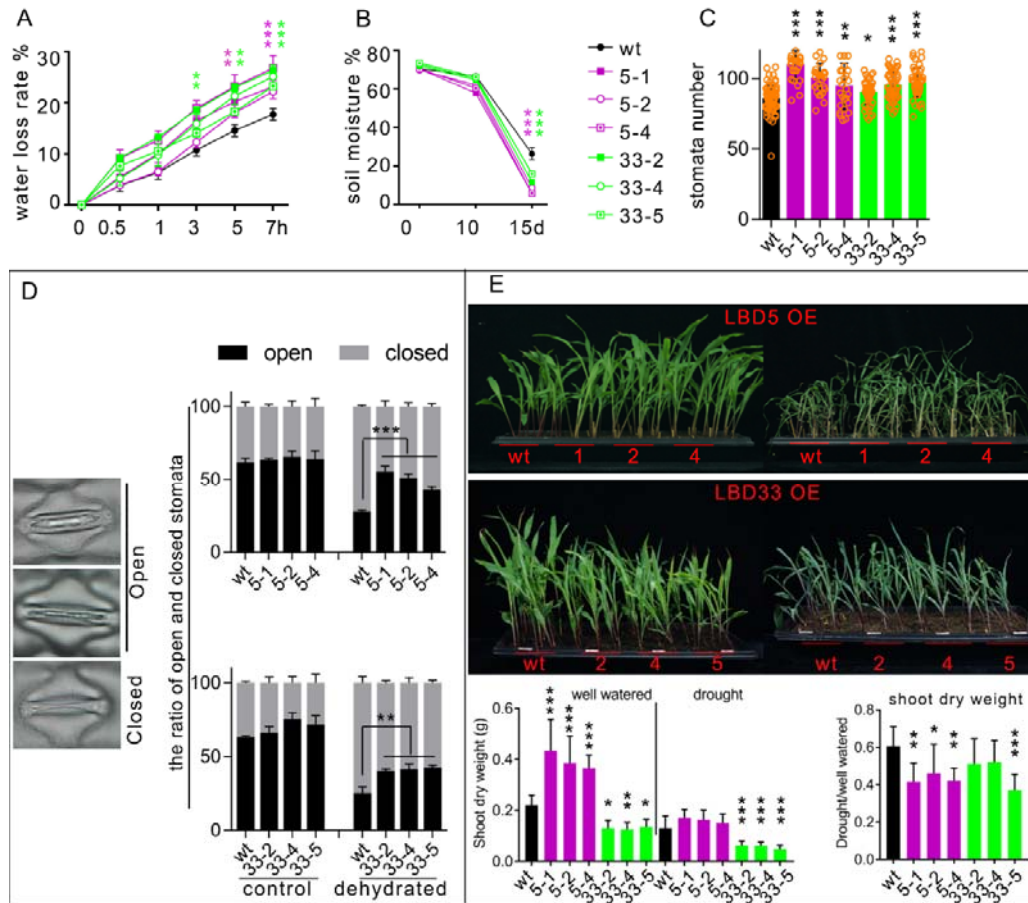

599

600 **Figure 3. Overexpression of *ZmLBD5* or *ZmLBD33* promotes water loss.** (A) Water  
 601 loss rate of detached leaf. (B) Soil moisture of each pot grown with wild type or different  
 602 transgenic plants after the outage of water. (C) Stomata number of the third leaf on abaxial  
 603 surface. (D) The ratio of open and closed stomata 15 minutes after detachment.  
 604 Represented open and closed stomata were shown in the left panel. (E) Phenotype of  
 605 seedlings before and after drought stress when different lines of transgenic plants and  
 606 wild type were grown in the same pot. In panels (A), (B) and (D), if all three lines were  
 607 significant different with the wild type asterisk was labeled.

608

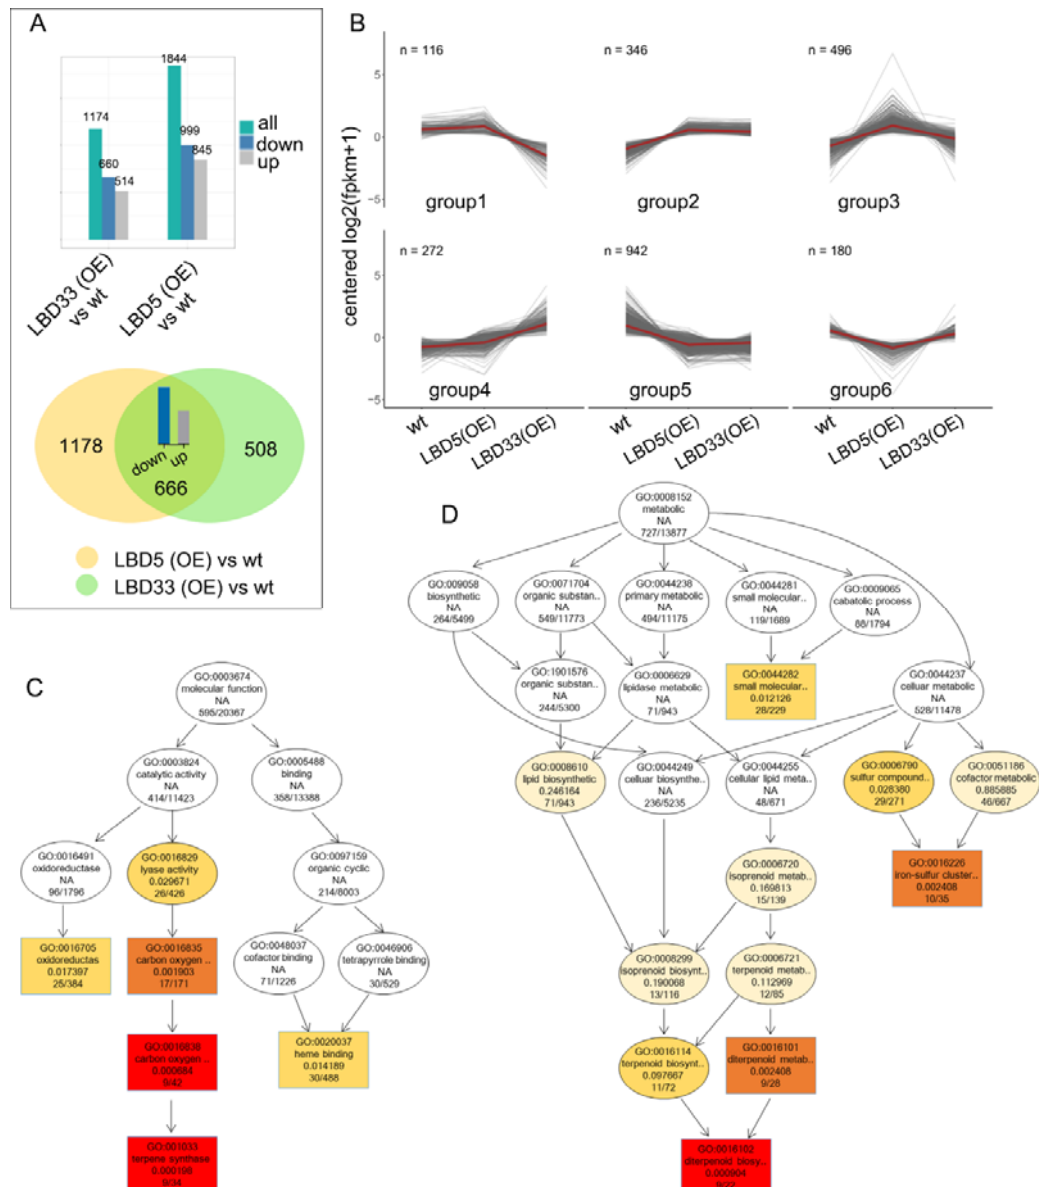

609

610 **Figure 4. RNA-seq indicates *ZmLBD5* and *ZmLBD33* function in terpenoid**  
 611 **metabolic pathway.** (A) Different expressed gene (DEG) number in *LBD5* or *LBD33*  
 612 overexpressed plants compared with the wild type. The fold change larger than 2 or  
 613 smaller than 0.5 were determined as DEGs. (B) All of the DEGs were classified into 6  
 614 groups by the centered and logarithmic transformed expression levels in wild type, *LBD5*  
 615 (OE) and *LBD33* (OE). Directed Acyclic Graph of gene ontology enrichment analysis by  
 616 using DEGs from *LBD5* overexpressed plants (C) and *LBD33* overexpressed plants (D).  
 617 The four lines of information in each circle represent GO number, function annotation,  
 618 P-value of GO enrichment significance test, and DEG number/background gene number,  
 619 respectively. The darker the circle, the higher the enrichment.

620

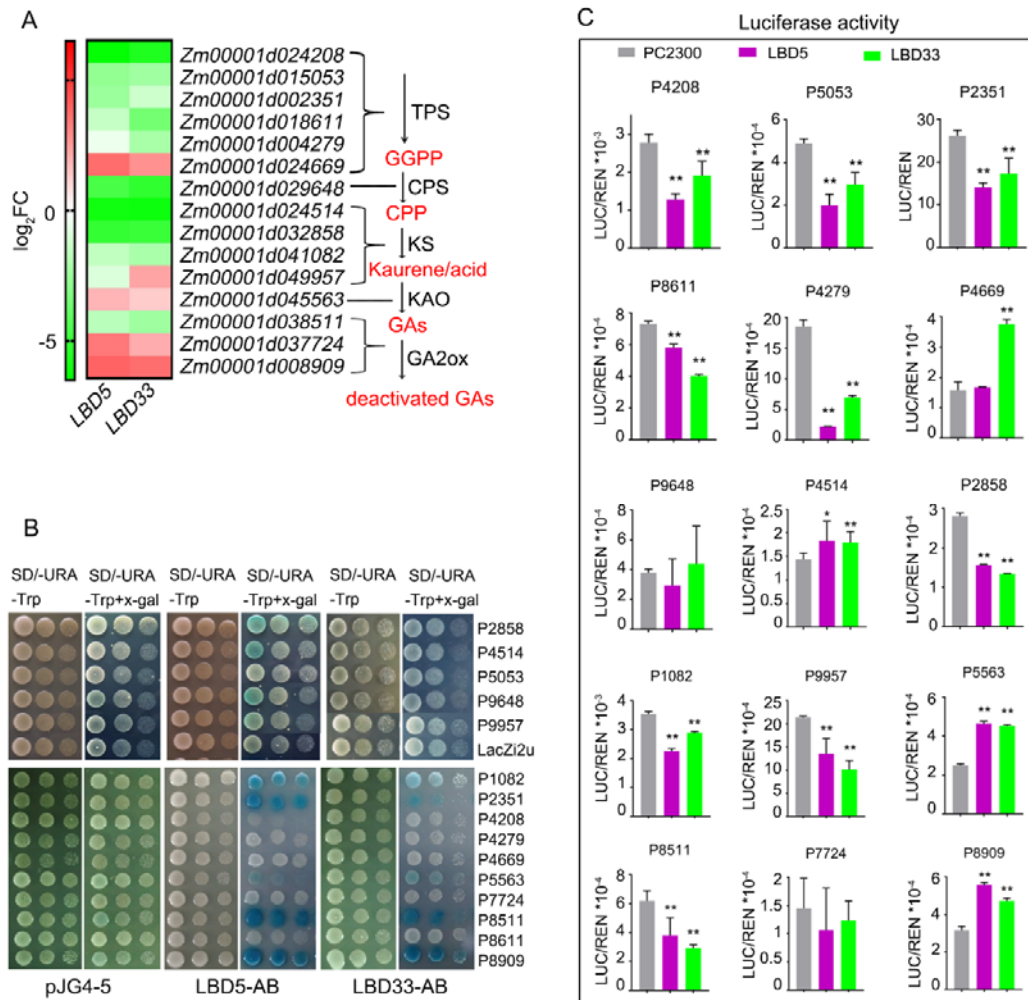

621

622 **Figure 5. ZmLBD5 and ZmLBD33 directly regulate TPS-KS-GA2ox gene module.** (A)

623 15 DEGs in the most enriched GO terms in figure 4C and 4D were listed. The expression

624 fold change (FC) was converted to a logarithmic scale with base 2 and shown as different

625 color. TPS: terpene synthase; CPS: *ent*-copalyl diphosphate synthase; KS: *ent*-kaurene

626 synthase; KAO: *ent*-kaurenoic acid oxidase; GA2ox: GA 2-oxidase; GGPP:

627 geranylgeranyl diphosphate; CPP: *ent*-copalyl diphosphate. (B) Y1H testing whether

628 AB-segment of LBD5 and LBD33 bind to the promoters of five candidate genes. The yeast

629 cells harboring the indicated plastid combinations were grown on nonselective

630 (SD/-Ura/-Trp) or color development (SD/-Ura/-Trp/+x-gal) medium. The last four number

631 of the candidate gene name was used to represent corresponding gene. Cells were

632 diluted in three concentrations from left to right. (C) dual-luciferase reporter system was

633 used to investigate the regulation of LBD5/LBD33 on candidate genes. Asterisks on bar

634 represent the difference compared with wild type is significant.

635

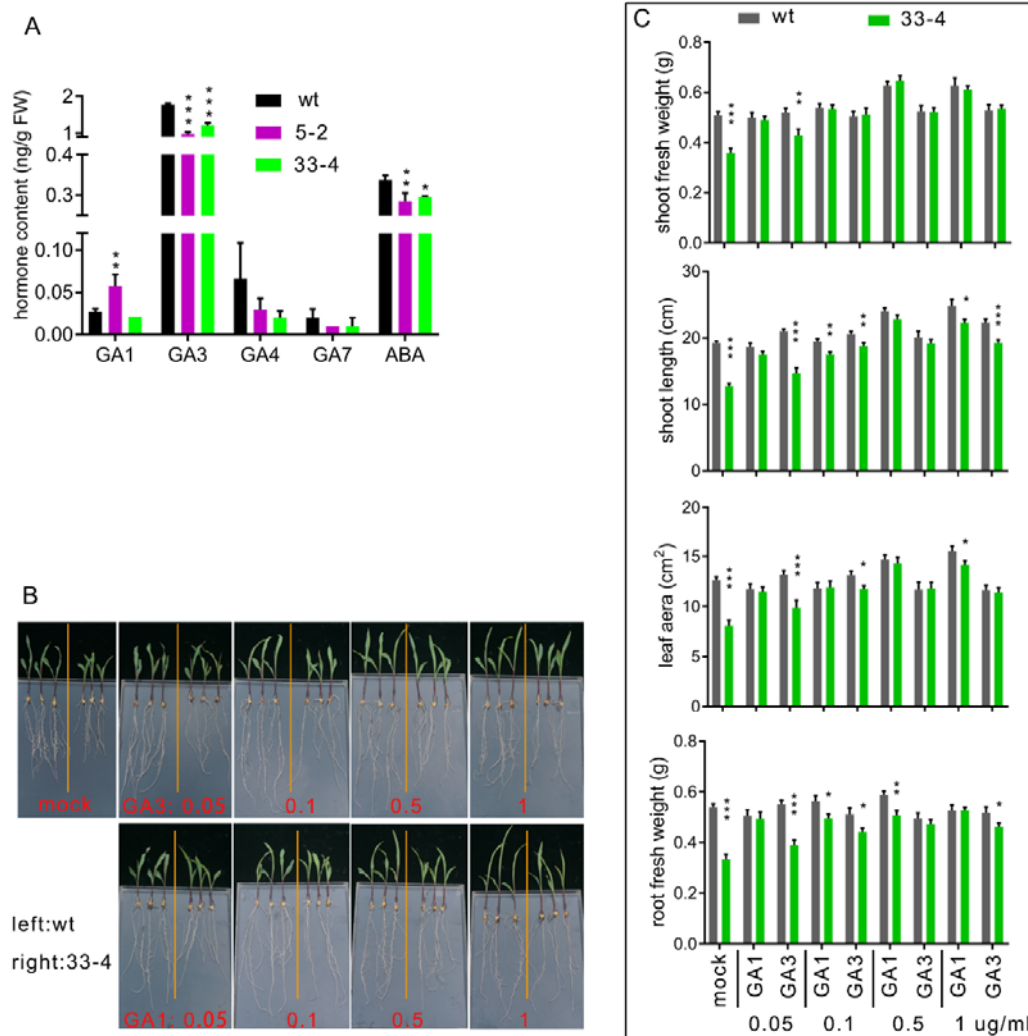

636

637 **Figure 6. Exogenous GA<sub>1</sub> and GA<sub>3</sub> rescue the dwarf phenotype of *ZmLBD33***  
 638 **overexpressed plants.** (A) Endogenous content of GAs and ABA of 12-days-old  
 639 seedlings. (B) Phenotype and (C) quantitative description of shoot length, leaf area, shoot  
 640 fresh weight and root fresh weight. Asterisks on bar represent the difference compared  
 641 with wild type is significant.

642

643

644

645

646

647

648

649

650

651

652



653 **Supplemental materials**

**A**

```

LBD5 MRMSCNGCRVLRKGCSDACTI RPCLQW KSPEAQANATVFLAKFYGRAGLLNLLAAPPADHLRPAAFRSLLYEACGRI VN 80
LBD33 MRMSCNGCRVLRKGCSDACTI RPCLQW DSPEAQANATVFLAKFYGRAGLLNLLAAPPDAAARPAVFRSLLYEACGRI VN 80

LBD5 PVYGSVGLLWSGQWQACQAAVEAVLKGDPV VQVQV-- DAASDASPPLGPRR- - - - - HDI RHVARDP- - AAAPDVL- - L 147
LBD33 PVYGSVGLLWSRRWQSCVDAVEAVLKGDPVVQVDAGSEAAAAAPALLGASRPAAPPAAYDI RHVARDPDAVAADLLRVA 160

LBD5 RSSSR- - - KRAASSTSSKHN- - - QPGSSKRA SLGKNRQRAEQE- - - - - PVPMVVE- - HGEESAGSHDHDHQQHRL 211
LBD33 RGGGRRRFKRA GSSNACKAKPLK GKASSNERASPSPTQRQHQQETE EEELEPVP MVVELEHGEESAGSHDHHH- - HLQP 238

LBD5 QGSEEDTDVEAASHAHSHV SQAEP EPEPETEPQSHAPPA CSQQANQEHQDDEDEELALEL TLGLEPLVRQRQRPKSSRS 291
LBD33 QGSEEDTDVEAAS- - - HYSQAEAE P- - - - - PVYSSQALVADQ- - EGEEVRL E L TLGFEPVVRQQPR- - - - L S 297

LBD5 DCDHSGLSAASSLMCLRLQLPA 313
LBD33 CCDSSGLSAASSLI GLRLQLPAA 320
    
```

**B**

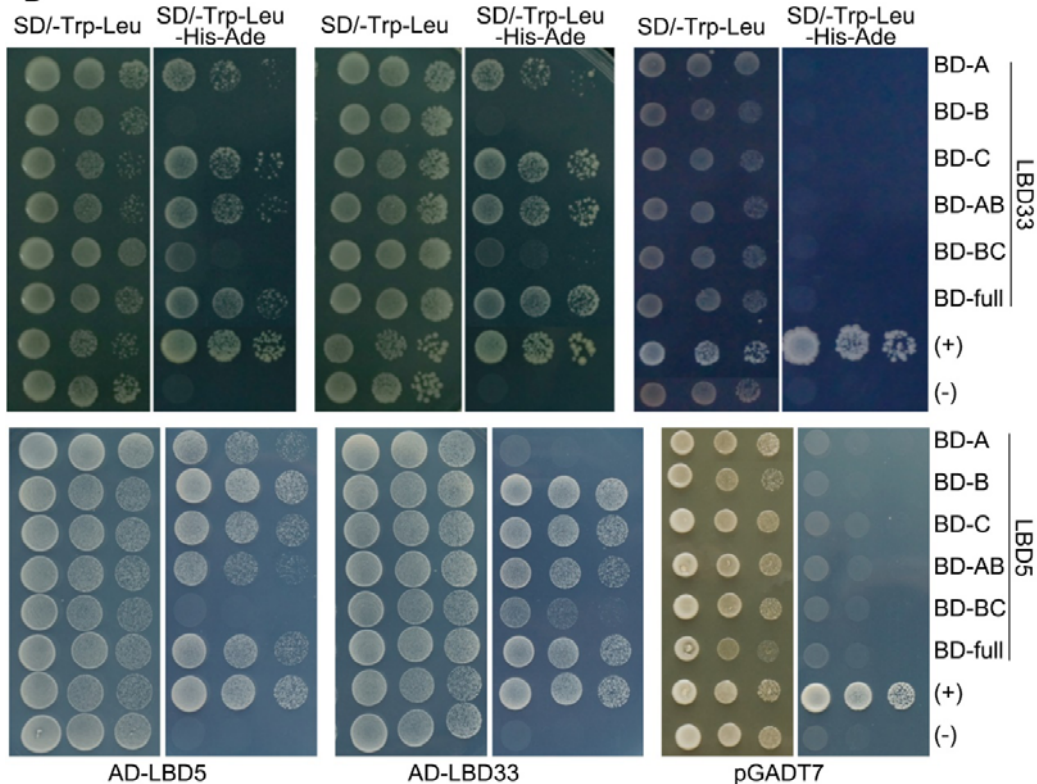

654

655

656

657

658

659

660

661

662

663

**Figure S1. Investigation of the hetero- and homo- protein-protein interaction of ZmLBD5 and ZmLBD33.** (A) Three segments of ZmLBD5 and ZmLBD33 were divided from red arrows indicated two sites. (B) Different segments of ZmLBD5 and ZmLBD33 were cloned into pGBK-T7 and fused with BD. Full codon region of ZmLBD5 and ZmLBD33 were cloned into pGAD-T7 and fused with AD. The yeast cells harboring the indicated plasmid combinations were grown on nonselective (SD/-Trp/-Leu) or selective (SD/-Trp/-Leu/-His/-Ade) medium. Cells were diluted in three concentrations from left to right.

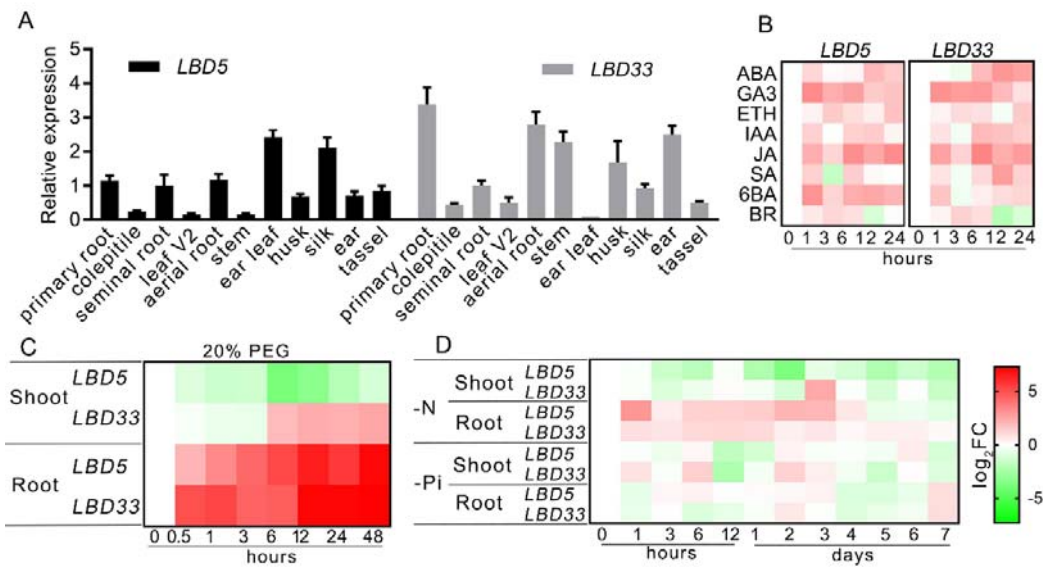

664

665 **Figure S2. Expression of *ZmLBD5* and *ZmLBD33* upon different tissues and**  
 666 **different stimuli.** (A) Expression of *ZmLBD5* and *ZmLBD33* in different tissues, (B) upon  
 667 different phytohormones, (C) upon PEG caused osmotic stress, (D) upon nitrogen or  
 668 phosphorus deficiency. Fold change of expression relative to 0 point of treatment is  
 669 converted to a logarithmic scale with base 2 and shown as different color in (B), (C), and  
 670 (D).  
 671

671

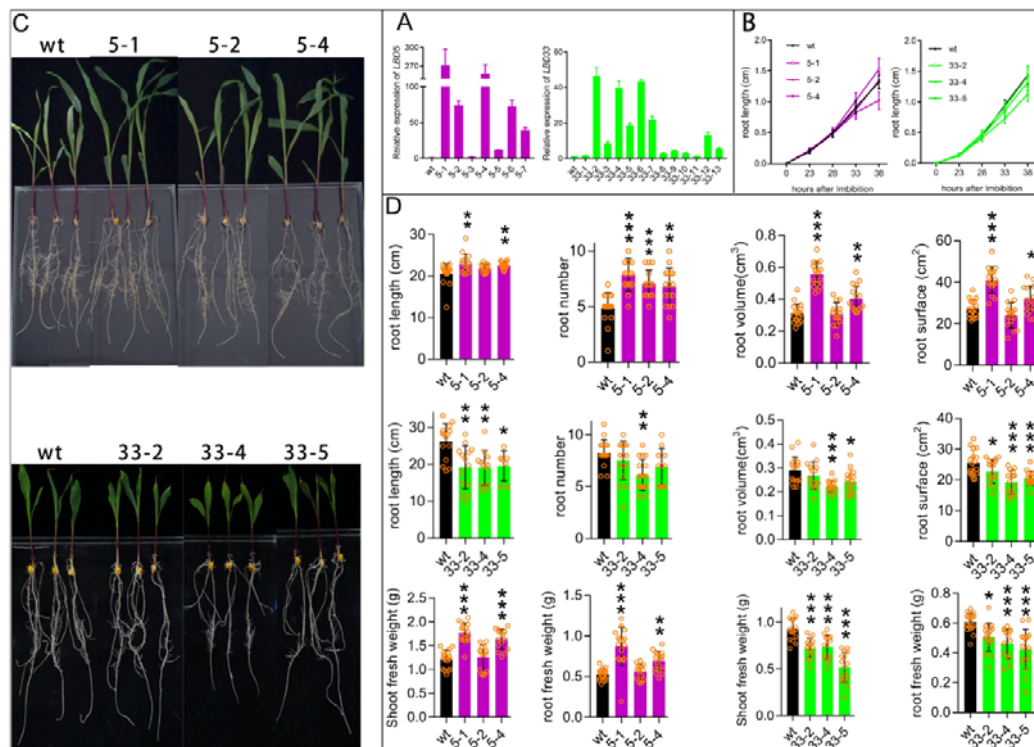

672

673 **Figure S3. Phenotypic investigation of representative transgenic lines upon**

674 **hydroponic conditions.** (A) Relative expression of *LBD5* and *LBD33* in different  
 675 transgenic lines. (B) The primary root length at different time after imbibition. (C)  
 676 Phenotype and (D) quantitative description of primary root length, root number, root  
 677 volume, root surface, shoot fresh weight and root fresh weight. Asterisks on bar represent  
 678 the difference compared with wild type is significant.  
 679

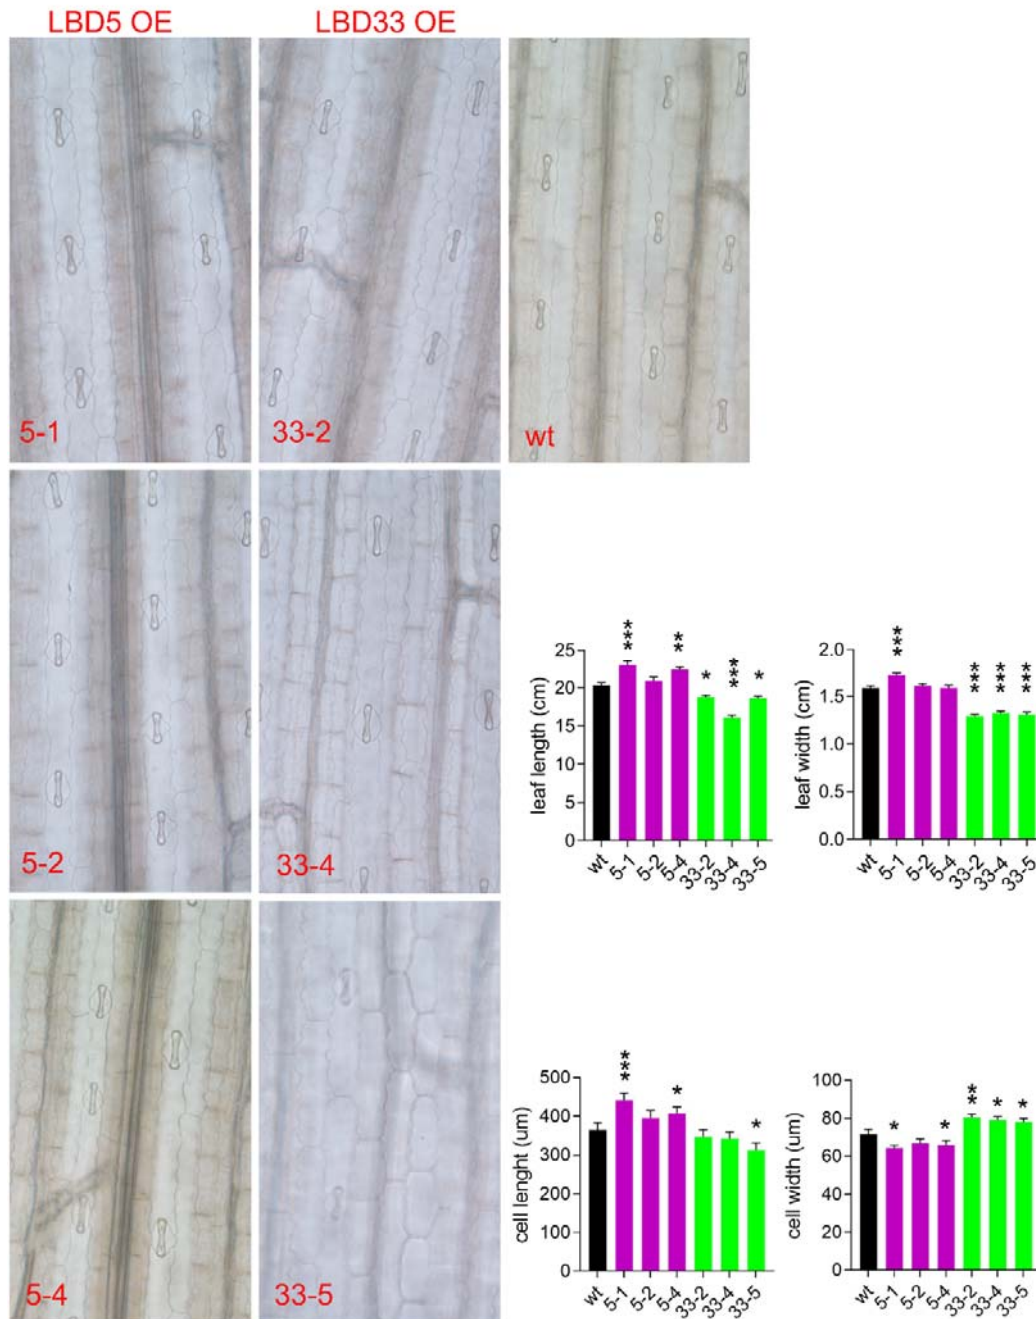

680  
 681 **Figure S4. Microscale phenotype of third leaf on adaxial surface, cell length, cell**  
 682 **width, leaf length and leaf width.** Asterisks on bar represent the difference compared  
 683 with wild type is significant.

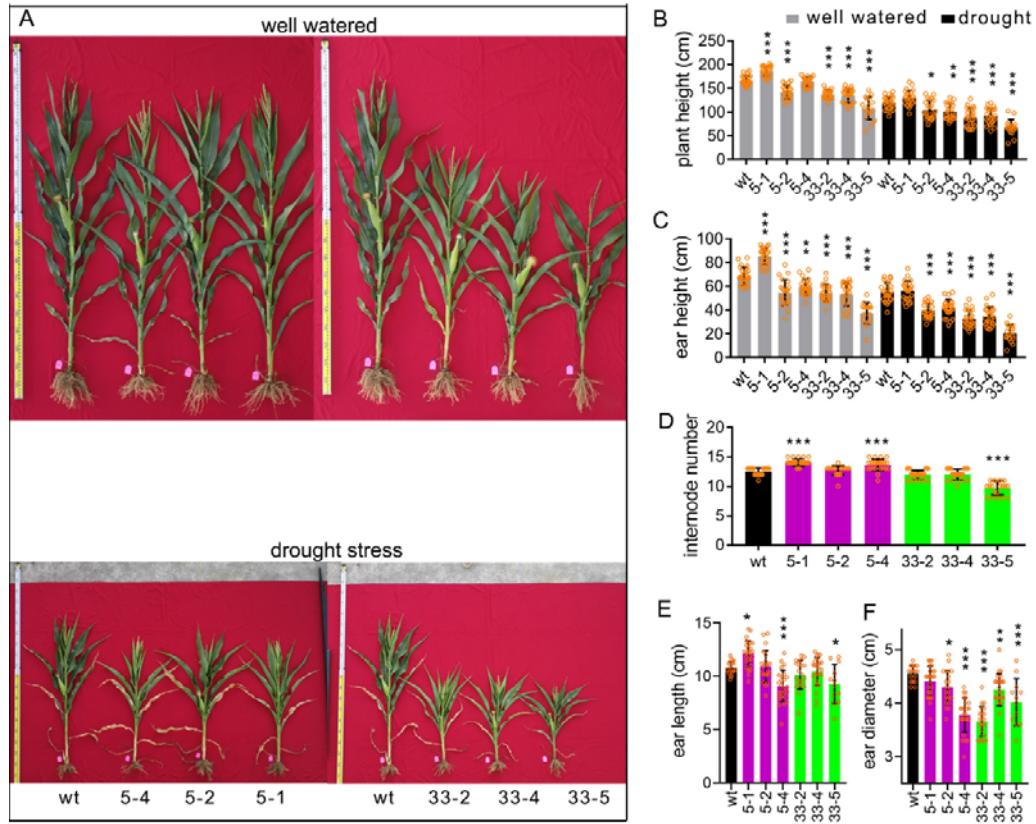

684

685 **Figure S5. Phenotype of plants after tasseling.** (A) Representative plants under well  
686 water condition. Plant height (B), Ear height (C), and internode number (D) of transgenic  
687 plants and wild type in field upon well water and drought conditions. Asterisks on bar  
688 represent the difference compared with wild type is significant.

689

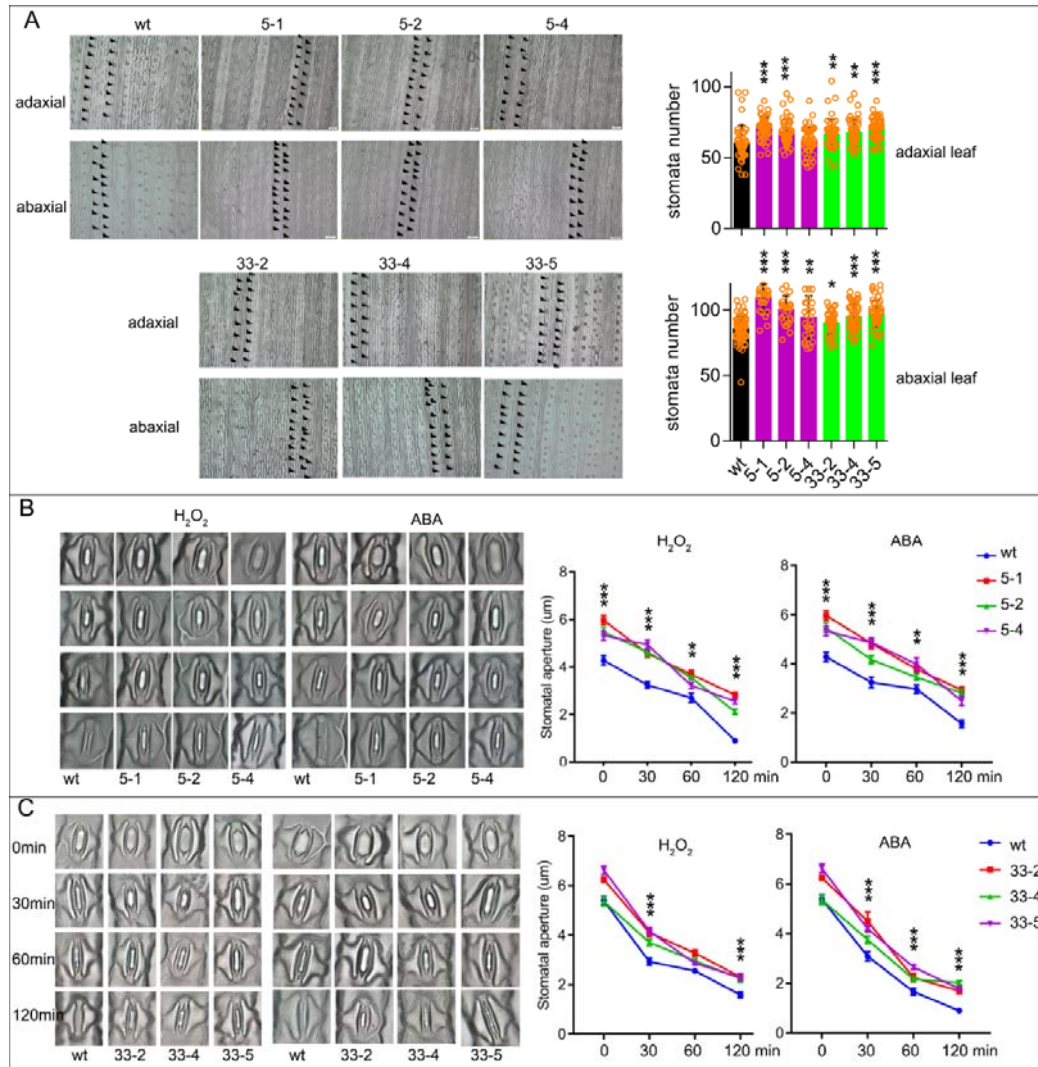

690

691 **Figure S6. Stomata number and stomatal aperture upon ABA or H<sub>2</sub>O<sub>2</sub> treatment. (A)**  
 692 Stomata number of the third leaf on abaxial surface and adaxial surface. Stomatal  
 693 aperture of *LBD5* (B) and *LBD33* (C) overexpressed plants after ABA or H<sub>2</sub>O<sub>2</sub> treatment.  
 694 Asterisks on bar represent the difference compared with wild type is significant. In B and C,  
 695 if all three lines were significant different with the wild type asterisk was labeled.  
 696

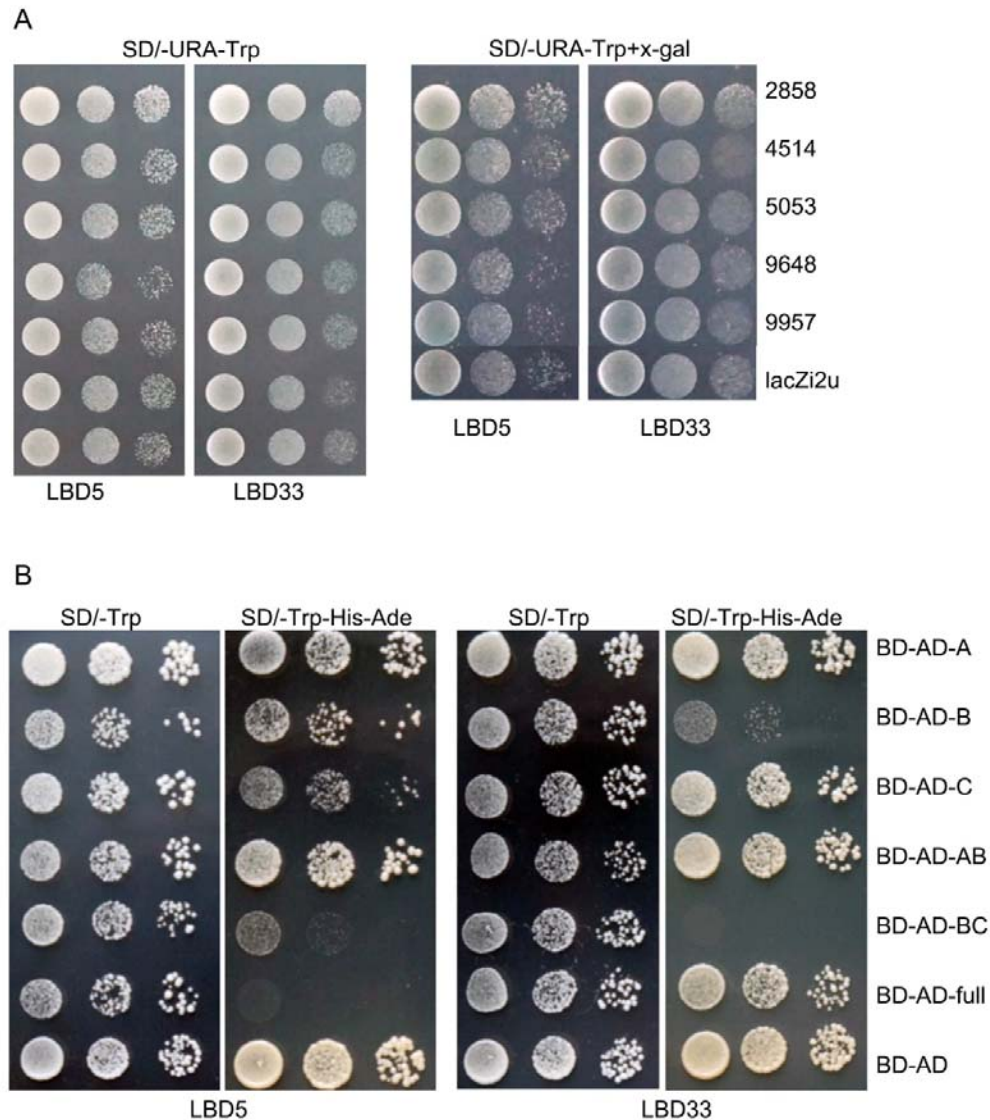

697

698 **Figure S7. Yeast one-hybrid and potential transcriptional inhibition activity of LBD5**

699 **and LBD33.** (A) The yeast cells harboring the indicated plastid combinations were grown

700 on nonselective (SD/-Ura/-Trp) or color development (SD/-Ura/-Trp/+x-gal) medium. The

701 last four number of the candidate gene name was used to represent corresponding gene.

702 (B) Different segments of LBD5 and LBD33 were fused with Gal4-AD and cloned into

703 pGBK-T7 to fuse with Gal4-BD. The yeast cells harboring indicated construct were grown

704 on nonselective (SD/-Trp) or selective (SD/-Trp/-His/-Ade) medium. Cells were diluted in

705 three concentrations from left to right.

706

707

708 **Table S1. internode length of plants after tasseling in field.**

709 **Table S2. DEGs in LBD5- and LBD33- overexpressing plant.**

710 **Table S3. Enriched GO terms and gene list in GGPP-CPP-kaurene/acid-GA**

- 711 **metabolism and P450 members.**  
712 **Table S4. Plasmid constructs and primers used in this study.**  
713 **Table S5. primers for real-time qPCR.**

## Parsed Citations

- Albinsky D, Kusano M, Higuchi M, Hayashi N, Kobayashi M, Fukushima A, Mori M, Ichikawa T, Matsui K, Kuroda H, Horii Y, Tsumoto Y, Sakakibara H, Hirochika H, Matsui M, Saito K (2010) Metabolomic screening applied to rice FOX Arabidopsis lines leads to the identification of a gene-changing nitrogen metabolism. Mol Plant 3: 125-142**  
Google Scholar: [Author Only](#) [Title Only](#) [Author and Title](#)
- Bao S, Hua C, Shen L, Yu H (2020) New insights into gibberellin signaling in regulating flowering in Arabidopsis. J Integr Plant Biol 62: 118-131**  
Google Scholar: [Author Only](#) [Title Only](#) [Author and Title](#)
- Bortiri E, Chuck G, Vollbrecht E, Rocheford T, Martienssen R, Hake S (2006) ramosa2 encodes a LATERAL ORGAN BOUNDARY domain protein that determines the fate of stem cells in branch meristems of maize. Plant Cell 18: 574-585**  
Google Scholar: [Author Only](#) [Title Only](#) [Author and Title](#)
- Chen Y, Hou M, Liu L, Wu S, Shen Y, Ishiyama K, Kobayashi M, McCarty DR, Tan BC (2014) The maize DWARF1 encodes a gibberellin 3-oxidase and is dual localized to the nucleus and cytosol. Plant Physiol 166: 2028-2039**  
Google Scholar: [Author Only](#) [Title Only](#) [Author and Title](#)
- Colebrook EH, Thomas SG, Phillips AL, Hedden P (2014) The role of gibberellin signalling in plant responses to abiotic stress. J Exp Biol 217: 67-75**  
Google Scholar: [Author Only](#) [Title Only](#) [Author and Title](#)
- Du H, Chang Y, Huang F, Xiong L (2015) GID1 modulates stomatal response and submergence tolerance involving abscisic acid and gibberellic acid signaling in rice. J Integr Plant Biol 57: 954-968**  
Google Scholar: [Author Only](#) [Title Only](#) [Author and Title](#)
- Evans MM (2007) The indeterminate gametophyte1 gene of maize encodes a LOB domain protein required for embryo Sac and leaf development. Plant Cell 19: 46-62**  
Google Scholar: [Author Only](#) [Title Only](#) [Author and Title](#)
- Feng XJ, Li JR, Qi SL, Lin QF, Jin JB, Hua XJ (2016) Light affects salt stress-induced transcriptional memory of P5CS1 in Arabidopsis. Proc Natl Acad Sci U S A 113: E8335-E8343**  
Google Scholar: [Author Only](#) [Title Only](#) [Author and Title](#)
- Fu J, Ren F, Lu X, Mao H, Xu M, Degenhardt J, Peters RJ, Wang Q (2016) A Tandem Array of ent-Kaurene Synthases in Maize with Roles in Gibberellin and More Specialized Metabolism. Plant Physiol 170: 742-751**  
Google Scholar: [Author Only](#) [Title Only](#) [Author and Title](#)
- He J, Xin P, Ma X, Chu J, Wang G (2020) Gibberellin Metabolism in Flowering Plants: An Update and Perspectives. Front Plant Sci 11: 532**  
Google Scholar: [Author Only](#) [Title Only](#) [Author and Title](#)
- Hedden P (2003) The genes of the Green Revolution. Trends Genet 19: 5-9**  
Google Scholar: [Author Only](#) [Title Only](#) [Author and Title](#)
- Hedden P, Phillips AL (2000) Gibberellin metabolism: new insights revealed by the genes. Trends in Plant Science 5: 523-530**  
Google Scholar: [Author Only](#) [Title Only](#) [Author and Title](#)
- Hedden P, Proebsting WM (1999) Genetic Analysis of Gibberellin Biosynthesis. Plant Physiol 119: 365-370**  
Google Scholar: [Author Only](#) [Title Only](#) [Author and Title](#)
- Hedden P, Sponsel V (2015) A Century of Gibberellin Research. J Plant Growth Regul 34: 740-760**  
Google Scholar: [Author Only](#) [Title Only](#) [Author and Title](#)
- Iwakawa H, Iwasaki M, Kojima S, Ueno Y, Soma T, Tanaka H, Semiarti E, Machida Y, Machida C (2007) Expression of the ASYMMETRIC LEAVES2 gene in the adaxial domain of Arabidopsis leaves represses cell proliferation in this domain and is critical for the development of properly expanded leaves. Plant J 51: 173-184**  
Google Scholar: [Author Only](#) [Title Only](#) [Author and Title](#)
- Majer C, Hochholdinger F (2011) Defining the boundaries: structure and function of LOB domain proteins. Trends Plant Sci 16: 47-52**  
Google Scholar: [Author Only](#) [Title Only](#) [Author and Title](#)
- Majer C, Xu C, Berendzen KW, Hochholdinger F (2012) Molecular interactions of ROOTLESS CONCERNING CROWN AND SEMINAL ROOTS, a LOB domain protein regulating shoot-borne root initiation in maize (Zea mays L.). Philos Trans R Soc Lond B Biol Sci 367: 1542-1551**  
Google Scholar: [Author Only](#) [Title Only](#) [Author and Title](#)
- Mehrotra R, Bhalothia P, Bansal P, Basantani MK, Bharti V, Mehrotra S (2014) Abscisic acid and abiotic stress tolerance - different tiers of regulation. J Plant Physiol 171: 486-496**  
Google Scholar: [Author Only](#) [Title Only](#) [Author and Title](#)
- Nagai K, Mori Y, Ishikawa S, Furuta T, Gamuyao R, Niimi Y, Hobo T, Fukuda M, Kojima M, Takebayashi Y, Fukushima A, Himuro Y,**



**Kobayashi M, Ackley W, Hisano H, Sato K, Yoshida A, Wu J, Sakakibara H, Sato Y, Tsuji H, Akagi T, Ashikari M (2020) Antagonistic regulation of the gibberellic acid response during stem growth in rice. *Nature* 584: 109-114**

Google Scholar: [Author Only](#) [Title Only](#) [Author and Title](#)

**Rubin G, Tohge T, Matsuda F, Saito K, Scheible WR (2009) Members of the LBD family of transcription factors repress anthocyanin synthesis and affect additional nitrogen responses in Arabidopsis. *Plant Cell* 21: 3567-3584**

Google Scholar: [Author Only](#) [Title Only](#) [Author and Title](#)

**Scheible WR, Morcuende R, Czechowski T, Fritz C, Osuna D, Palacios-Rojas N, Schindelasch D, Thimm O, Udvardi MK, Stitt M (2004) Genome-wide reprogramming of primary and secondary metabolism, protein synthesis, cellular growth processes, and the regulatory infrastructure of Arabidopsis in response to nitrogen. *Plant Physiol* 136: 2483-2499**

Google Scholar: [Author Only](#) [Title Only](#) [Author and Title](#)

**Semiarti E, Ueno Y, Tsukaya H, Iwakawa H, Machida C, Machida Y (2001) The ASYMMETRIC LEAVES2 gene of Arabidopsis thaliana regulates formation of a symmetric lamina, establishment of venation and repression of meristem-related homeobox genes in leaves. *Development* 128: 1771-1783**

Google Scholar: [Author Only](#) [Title Only](#) [Author and Title](#)

**Shuai B, Reynaga-Pena CG, Springer PS (2002) The lateral organ boundaries gene defines a novel, plant-specific gene family. *Plant Physiol* 129: 747-761**

Google Scholar: [Author Only](#) [Title Only](#) [Author and Title](#)

**Spray CR, Kobayashi M, Suzuki Y, Phinney BO, Gaskin P, MacMillan J (1996) The dwarf-1 (d1) Mutant of Zea mays blocks three steps in the gibberellin-biosynthetic pathway. *Proc Natl Acad Sci U S A* 93: 10515-10518**

Google Scholar: [Author Only](#) [Title Only](#) [Author and Title](#)

**Taramino G, Sauer M, Stauffer JL, Jr., Multani D, Niu X, Sakai H, Hochholdinger F (2007) The maize (*Zea mays* L.) RTCS gene encodes a LOB domain protein that is a key regulator of embryonic seminal and post-embryonic shoot-borne root initiation. *Plant J* 50: 649-659**

Google Scholar: [Author Only](#) [Title Only](#) [Author and Title](#)

**Teng F, Zhai L, Liu R, Bai W, Wang L, Huo D, Tao Y, Zheng Y, Zhang Z (2013) ZmGA3ox2, a candidate gene for a major QTL, qPH3.1, for plant height in maize. *Plant J* 73: 405-416**

Google Scholar: [Author Only](#) [Title Only](#) [Author and Title](#)

**White CN, Proebsting WM, Hedden P, Rivin CJ (2000) Gibberellins and Seed Development in Maize. I. Evidence That Gibberellin-Absciscic Acid Balance Governs Germination versus Maturation Pathways. *Plant Physiol* 122: 1081-1088**

Google Scholar: [Author Only](#) [Title Only](#) [Author and Title](#)

**Xiong L, Zhu JK (2003) Regulation of abscisic acid biosynthesis. *Plant Physiol* 133: 29-36**

Google Scholar: [Author Only](#) [Title Only](#) [Author and Title](#)

**Xu C, Luo F, Hochholdinger F (2016) LOB Domain Proteins: Beyond Lateral Organ Boundaries. *Trends Plant Sci* 21: 159-167**

Google Scholar: [Author Only](#) [Title Only](#) [Author and Title](#)

**Xu C, Tai H, Saleem M, Ludwig Y, Majer C, Berendzen KW, Nagel KA, Wojciechowski T, Meeley RB, Taramino G, Hochholdinger F (2015) Cooperative action of the paralogous maize lateral organ boundaries (LOB) domain proteins RTCS and RTCL in shoot-borne root formation. *New Phytol* 207: 1123-1133**

Google Scholar: [Author Only](#) [Title Only](#) [Author and Title](#)

**Yu Q, Hu S, Du J, Yang Y, Sun X (2020) Genome-wide identification and characterization of the lateral organ boundaries domain gene family in Brassica rapa var. rapa. *Plant Divers* 42: 52-60**

Google Scholar: [Author Only](#) [Title Only](#) [Author and Title](#)

**Zhang Y-m, Zhang S-z, Zheng C-c (2014) Genomewide analysis of LATERAL ORGAN BOUNDARIES Domain gene family in Zea mays. *J Genet* 93: 79-91**

Google Scholar: [Author Only](#) [Title Only](#) [Author and Title](#)

**Zimmermann R, Sakai H, Hochholdinger F (2010) The Gibberellic Acid Stimulated-Like gene family in maize and its role in lateral root development. *Plant Physiol* 152: 356-365**

Google Scholar: [Author Only](#) [Title Only](#) [Author and Title](#)
